# Supplementary material for: Posidonia Spheroids Intercepting Plastic Litter: Implication for Beach Clean-Ups
Source: Preprints.org preprint supplement (doi:10.20944/preprints202306.1286.v1), 2023-06-19
Supplement: Supplementary file 3 [file supplementary]

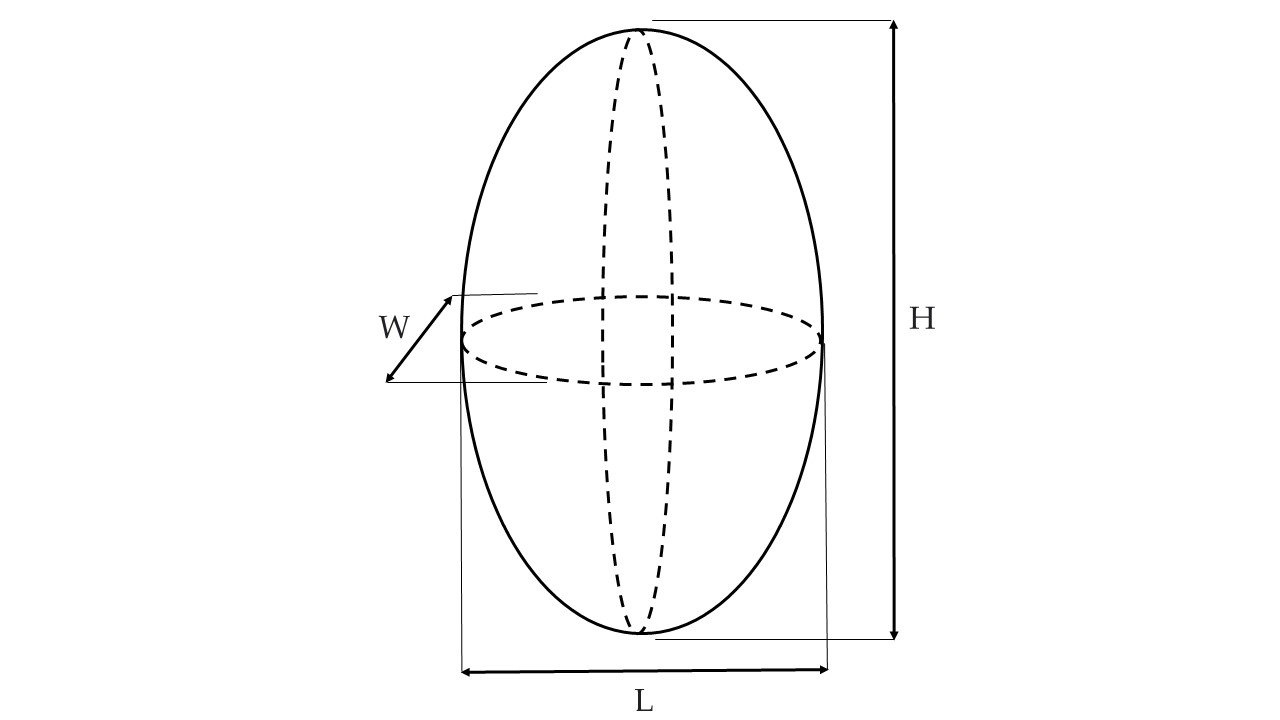


**Figure S1.** Biometry of Posidonia EG: length (L), width (W) and height (H).


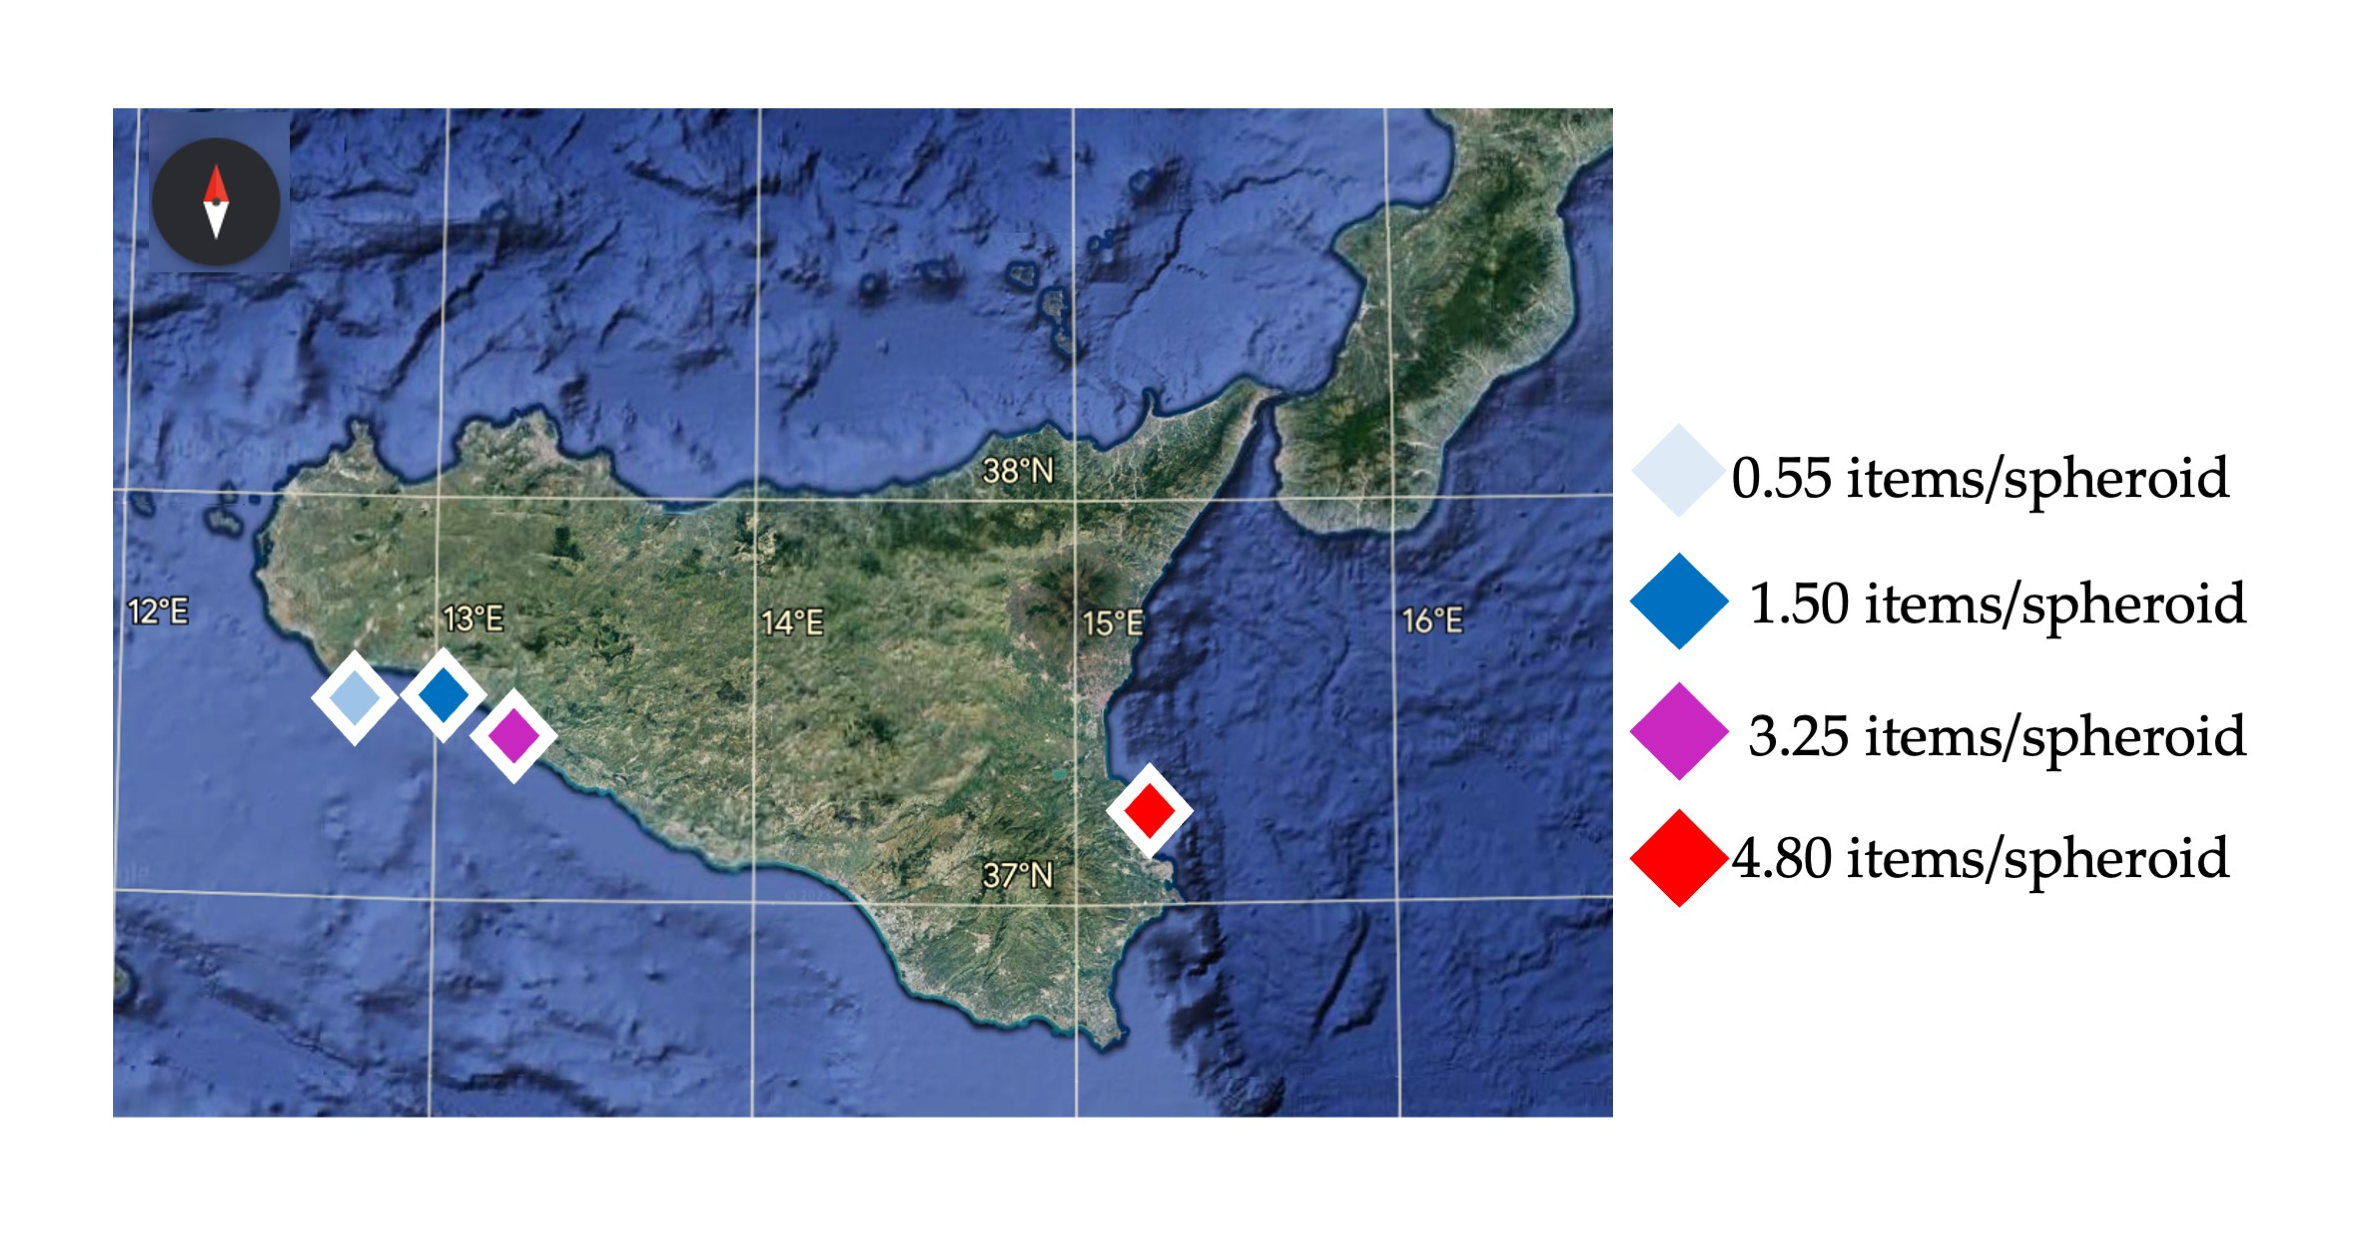


**Figure S2.** Map of abundance of plastic debris in EGs for each beach.
